# Supplementary material for: Ti functionalized hierarchical-pore UiO-66(Zr/Ti) catalyst for the transesterification of phenyl acetate and dimethyl carbonate
Source: Royal Society of Chemistry journal article supplement (doi:10.1039/c9nj04241e), 2019-01-01
Supplement: c9nj04241e7.pdf [file c9nj04241e7.pdf]

Electronic Supplementary Material (ESI) for New Journal of Chemistry

## Ti functionalized hierarchical-pore UiO-66(Zr/Ti) catalyst for the transesterification of phenyl acetate and dimethyl carbonate

Bingying Jia,<sup>a,b</sup> Miaojiang Wu,<sup>a,b</sup> Hua Zhang,<sup>a</sup> Yi Zeng,<sup>a</sup> and Gongying Wang<sup>\*,a</sup>

<sup>a</sup>Chengdu Institute of Organic Chemistry, Chinese Academy of Sciences, Chengdu 610041, China;

<sup>b</sup>National Engineering Laboratory for VOCs Pollution Control Material & Technology, University of Chinese Academy of Sciences, Beijing 101408, China

**Corresponding author:** wanggongying1102@126.com

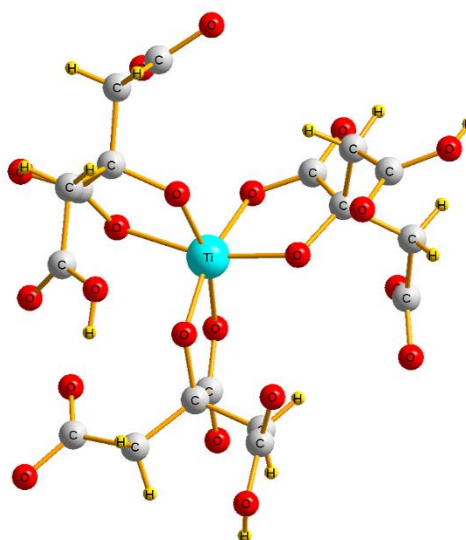

Scheme S1 ORTEP structure of the anion structure of Ti-Citrate with the atom-labeling

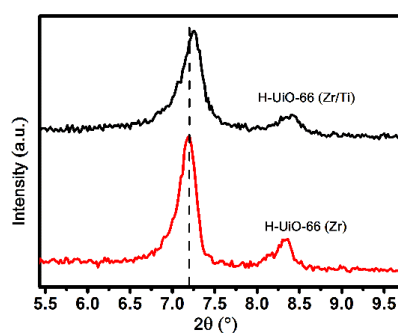

Fig. S1 The enlargement of the 2θ region from 5.5° to 10° in Fig. 1 (a)

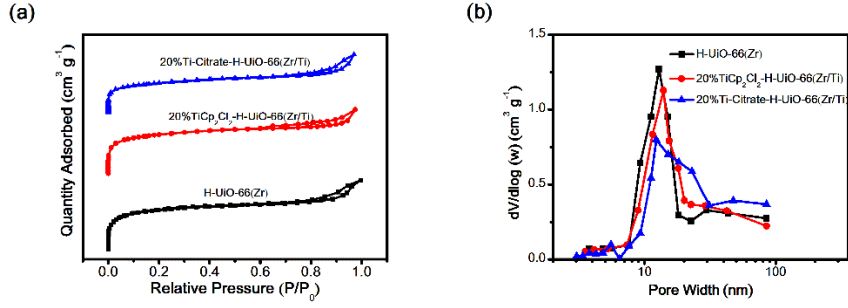

Fig. S2 (a) N<sub>2</sub> adsorption-desorption isotherms at 77K and (b) mesopore size distribution of Ti functionalized H-UiO-66(Zr/Ti) prepared with different Ti source

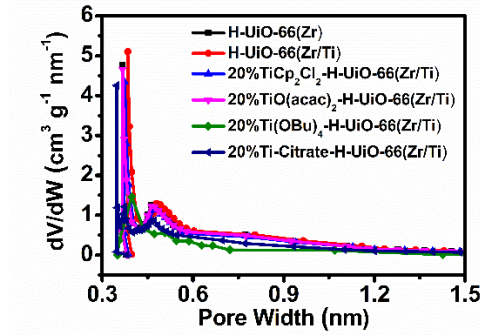

Fig. S3 micropore size distribution of synthesized samples

Table S1 XPS data for the Ti<sup>IV</sup> distribution in the samples

| Sample                                                | octahedral coordinated Ti <sup>IV</sup> (%) | tetrahedral coordinated Ti <sup>IV</sup> (%) |
|-------------------------------------------------------|---------------------------------------------|----------------------------------------------|
| H-UiO-66(Zr)                                          | -                                           | -                                            |
| H-UiO-66(Zr/Ti)                                       | 72.5                                        | 27.5                                         |
| 20%TiCp <sub>2</sub> Cl <sub>2</sub> -H-UiO-66(Zr/Ti) | 36.6                                        | 63.4                                         |
| 20%TiO(acac) <sub>2</sub> -H-UiO-66(Zr/Ti)            | 30.9                                        | 69.1                                         |
| 20%Ti(OBu) <sub>4</sub> -H-UiO-66(Zr/Ti)              | 18.8                                        | 81.2                                         |
| 20%Ti-Citrate-H-UiO-66(Zr/Ti)                         | 53.12                                       | 46.88                                        |

Table S2 XPS data for the Ti<sup>IV</sup> content in the sample

| Sample                                                | Ti (at%) | octahedral coordinated Ti <sup>IV</sup> (at%) | tetrahedral coordinated Ti <sup>IV</sup> (at%) | Zr (at%) | Surface octahedral coordinated Ti/Zr molar ratios |
|-------------------------------------------------------|----------|-----------------------------------------------|------------------------------------------------|----------|---------------------------------------------------|
| H-UiO-66(Zr)                                          | -        | -                                             | -                                              | 6.47     | -                                                 |
| H-UiO-66(Zr/Ti)                                       | 3.83     | 2.78                                          | 1.05                                           | 6.12     | 0.45                                              |
| 20%TiCp <sub>2</sub> Cl <sub>2</sub> -H-UiO-66(Zr/Ti) | 6.42     | 2.35                                          | 4.07                                           | 5.13     | 0.46                                              |
| 20%TiO(acac) <sub>2</sub> -H-UiO-66(Zr/Ti)            | 7.14     | 2.21                                          | 4.93                                           | 5.40     | 0.45                                              |
| 20%Ti(OBu) <sub>4</sub> -H-UiO-66(Zr/Ti)              | 14.47    | 2.72                                          | 11.75                                          | 5.44     | 0.50                                              |
| 20%Ti-Citrate-H-UiO-66(Zr/Ti)                         | 4.93     | 2.62                                          | 2.31                                           | 4.66     | 0.56                                              |

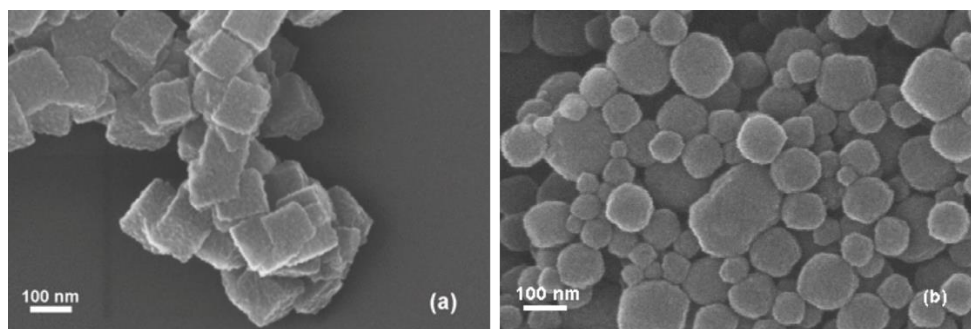

Fig. S4 SEM images of (a) UiO-66(Zr), (b) H-UiO-66(Zr)

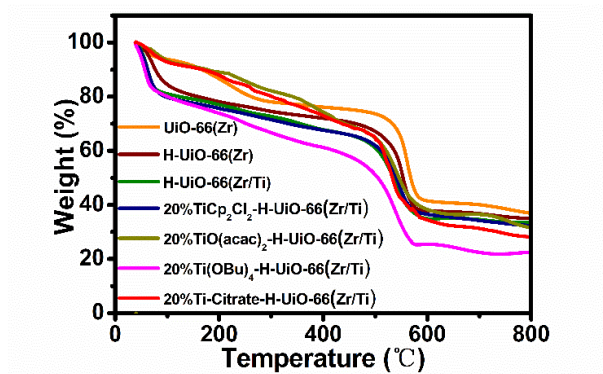

Fig. S5 TG curve of the synthesized samples

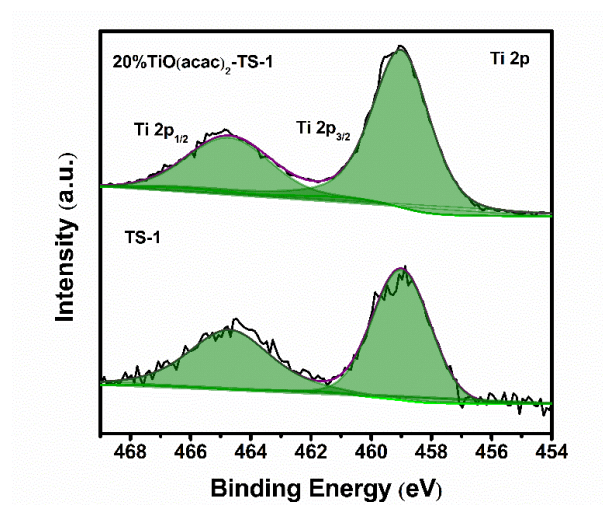

Fig. S6 Ti 2p XPS spectra of TS-1 and 20%TiO(acac)<sub>2</sub>-TS-1

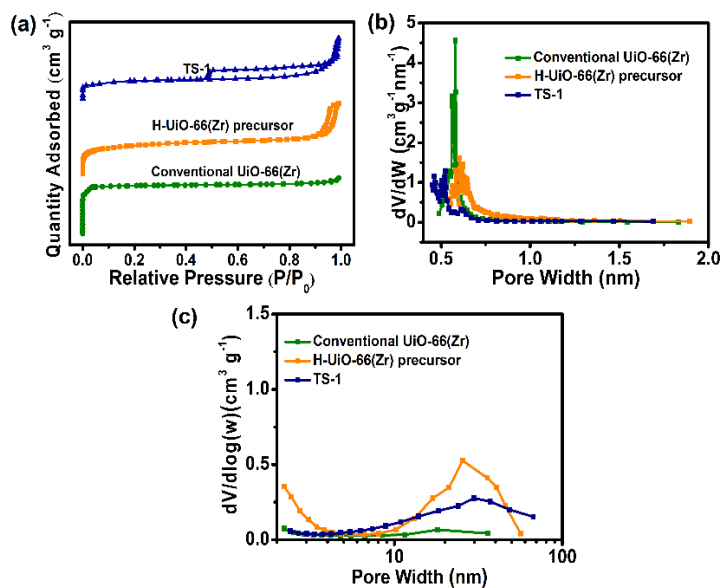

Fig. S7 (a) N<sub>2</sub> adsorption-desorption isotherms at 77K; (b) mesopore size distributions and (c) micropore size distribution of conventional UiO-66(Zr/Ti), H-UiO-66(Zr) precursor and TS-1

Table S3 XPS data for the Ti<sup>IV</sup> content in TS-1 and 20%TiO(acac)<sub>2</sub>-TS-1

| Sample                          | Ti (at%) | octahedral coordinated Ti <sup>IV</sup> (at%) | tetrahedral coordinated Ti <sup>IV</sup> (at%) | Si (at%) | Surface Ti/Si molar ratios |
|---------------------------------|----------|-----------------------------------------------|------------------------------------------------|----------|----------------------------|
| TS-1                            | 0.84     | 0                                             | 1.14                                           | 28.84    | 0.029                      |
| 20%TiO(acac) <sub>2</sub> -TS-1 | 2.52     | 0                                             | 2.52                                           | 27.93    | 0.09                       |

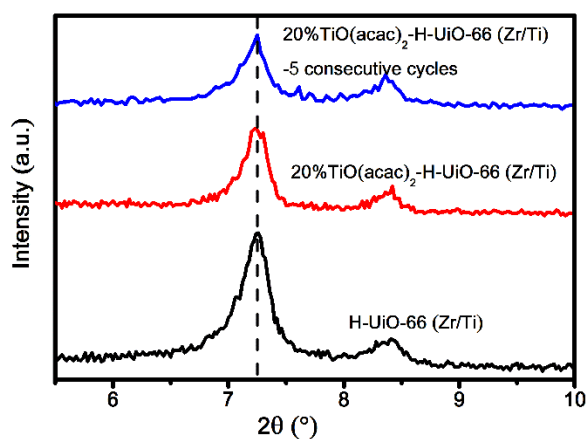

Fig S8 The enlargement of the 2θ region from 6° to 10.5° in Fig. 7 (a)
