# Supplementary figures and images for: Ti functionalized hierarchical-pore UiO-66(Zr/Ti) catalyst for the transesterification of phenyl acetate and dimethyl carbonate
Source: Royal Society of Chemistry journal article supplement (doi:10.1039/c9nj04241e), 2019-01-01

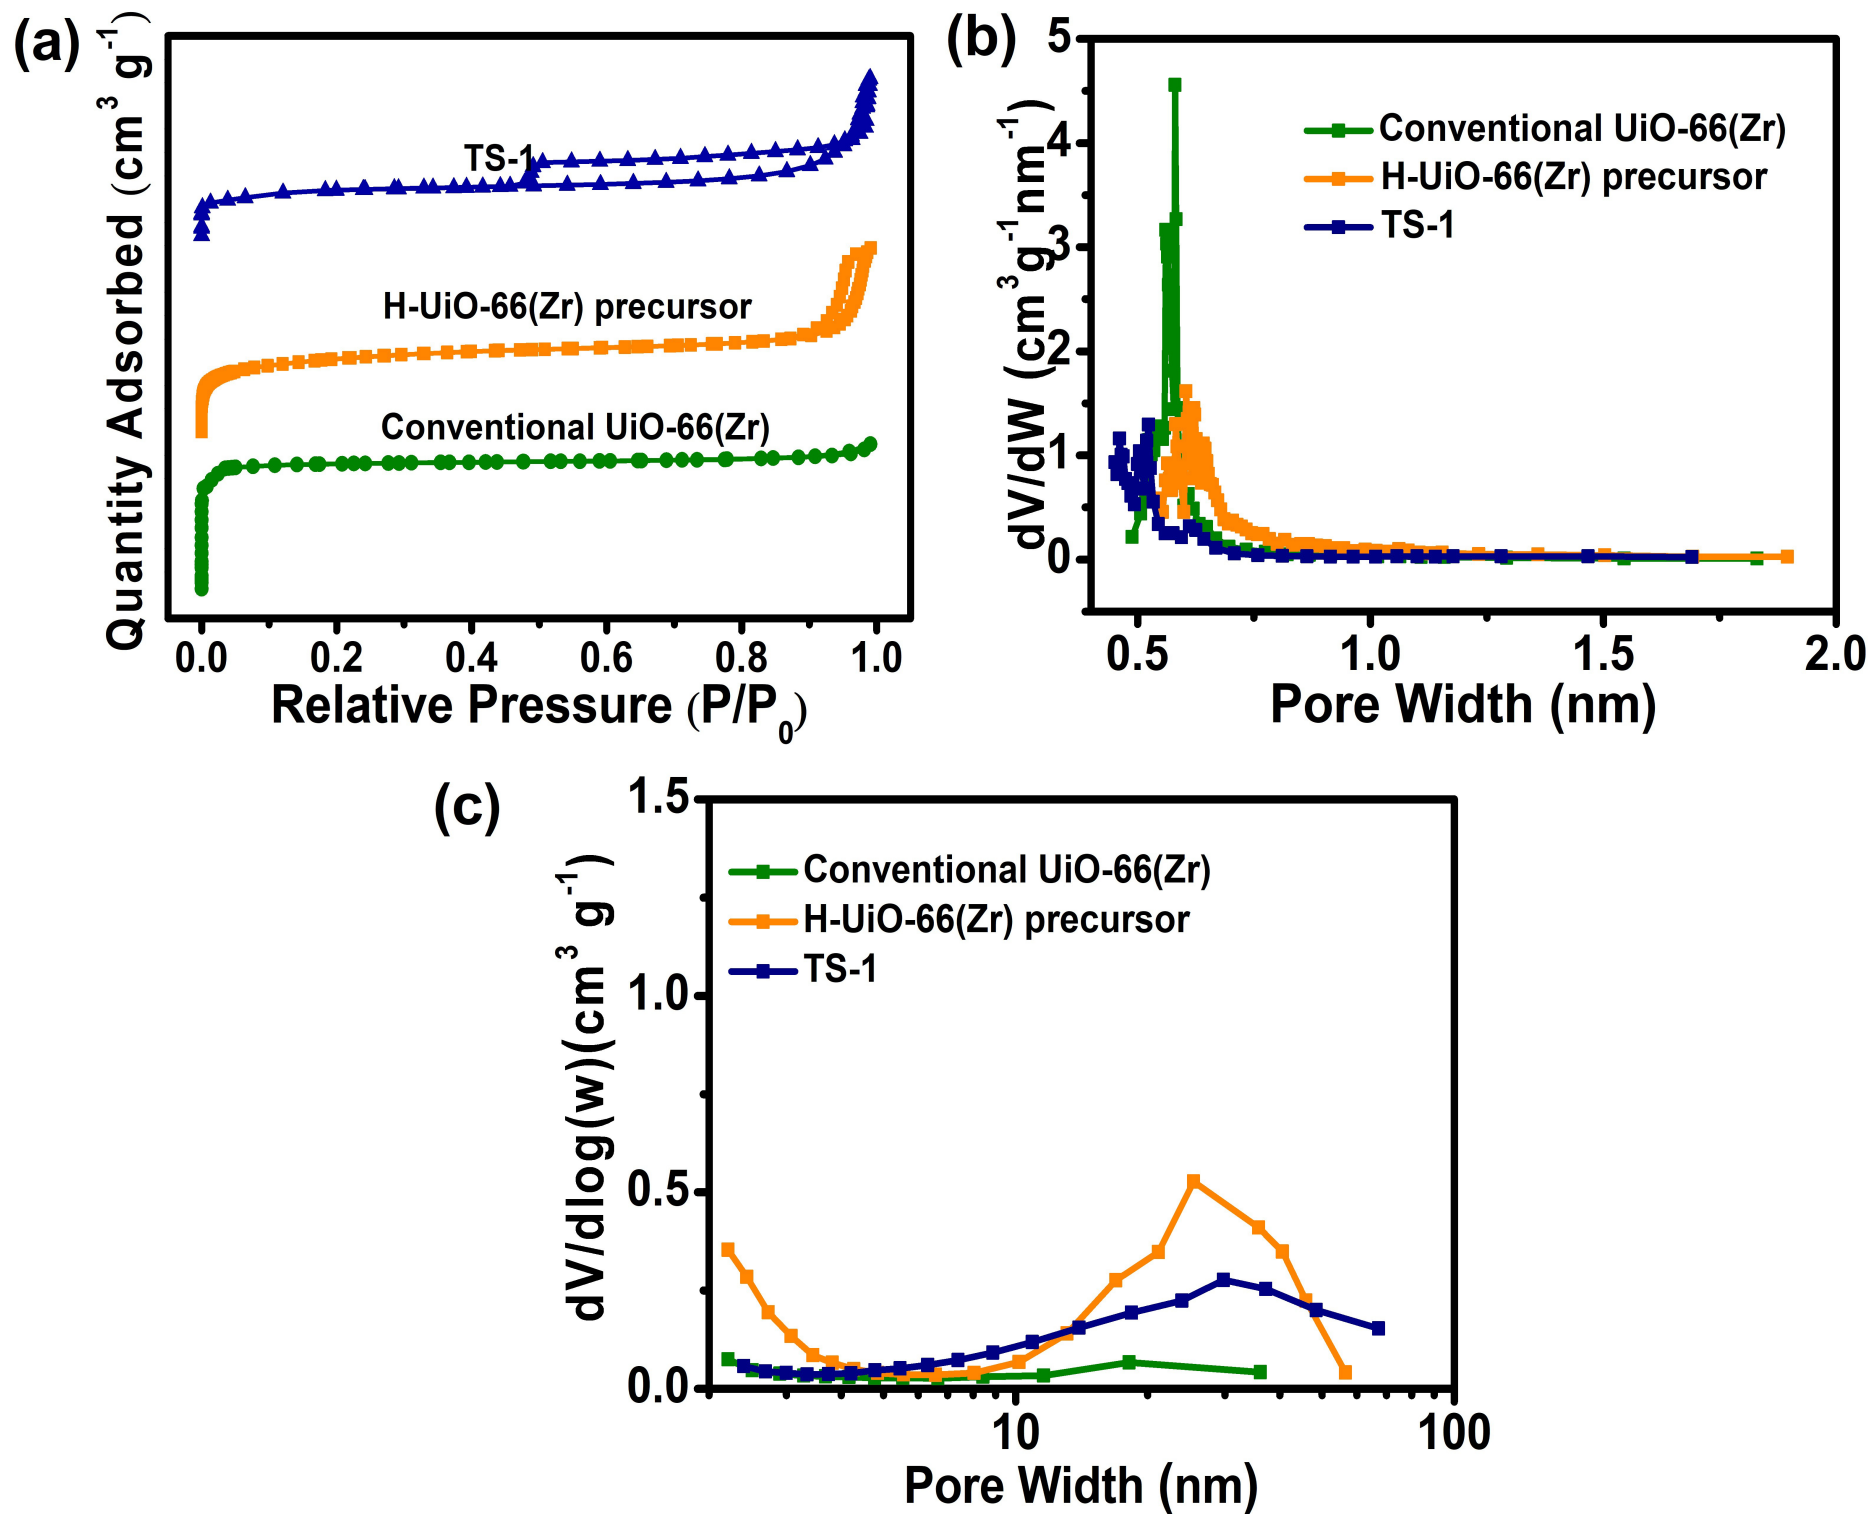

Supplement: c9nj04241e6.pdf [file c9nj04241e6.pdf]

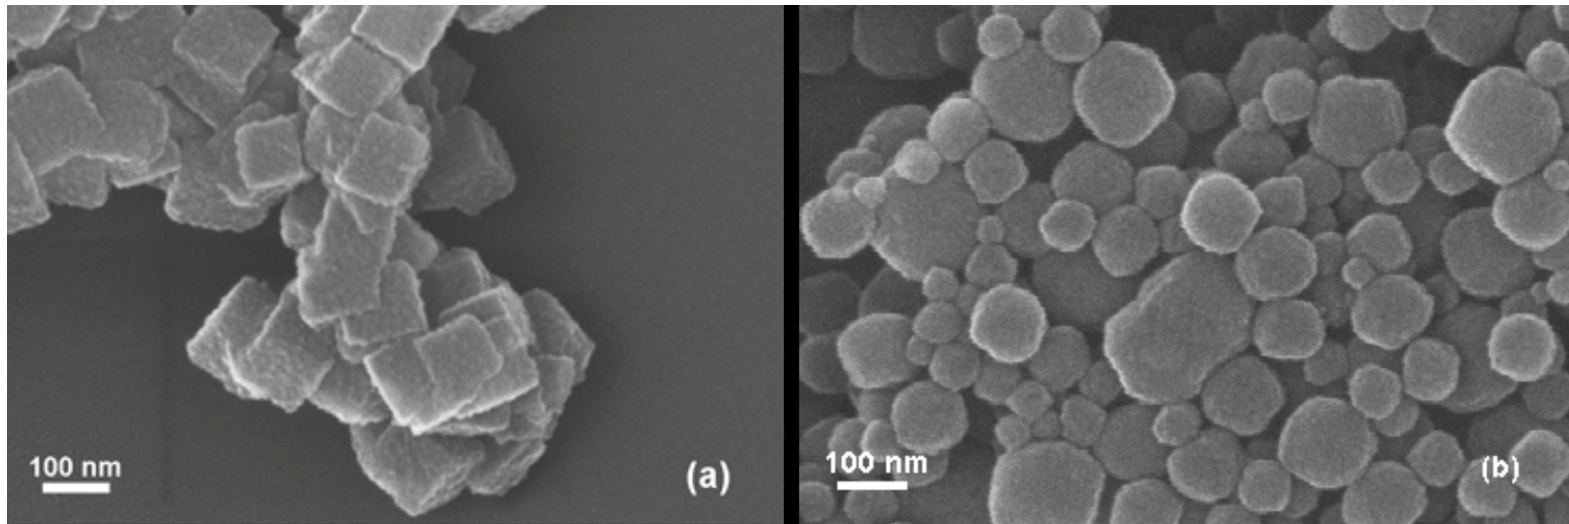

Supplement: c9nj04241e8.pdf [file c9nj04241e8.pdf]
